# Supplementary material for: Phylogenetic analysis of pectin-related gene families in Physcomitrella patens and nine other plant species yields evolutionary insights into cell walls
Source: PubMed Central journal article supplement (PMC4108027; doi:10.1186/1471-2229-14-79), 2014-03-26

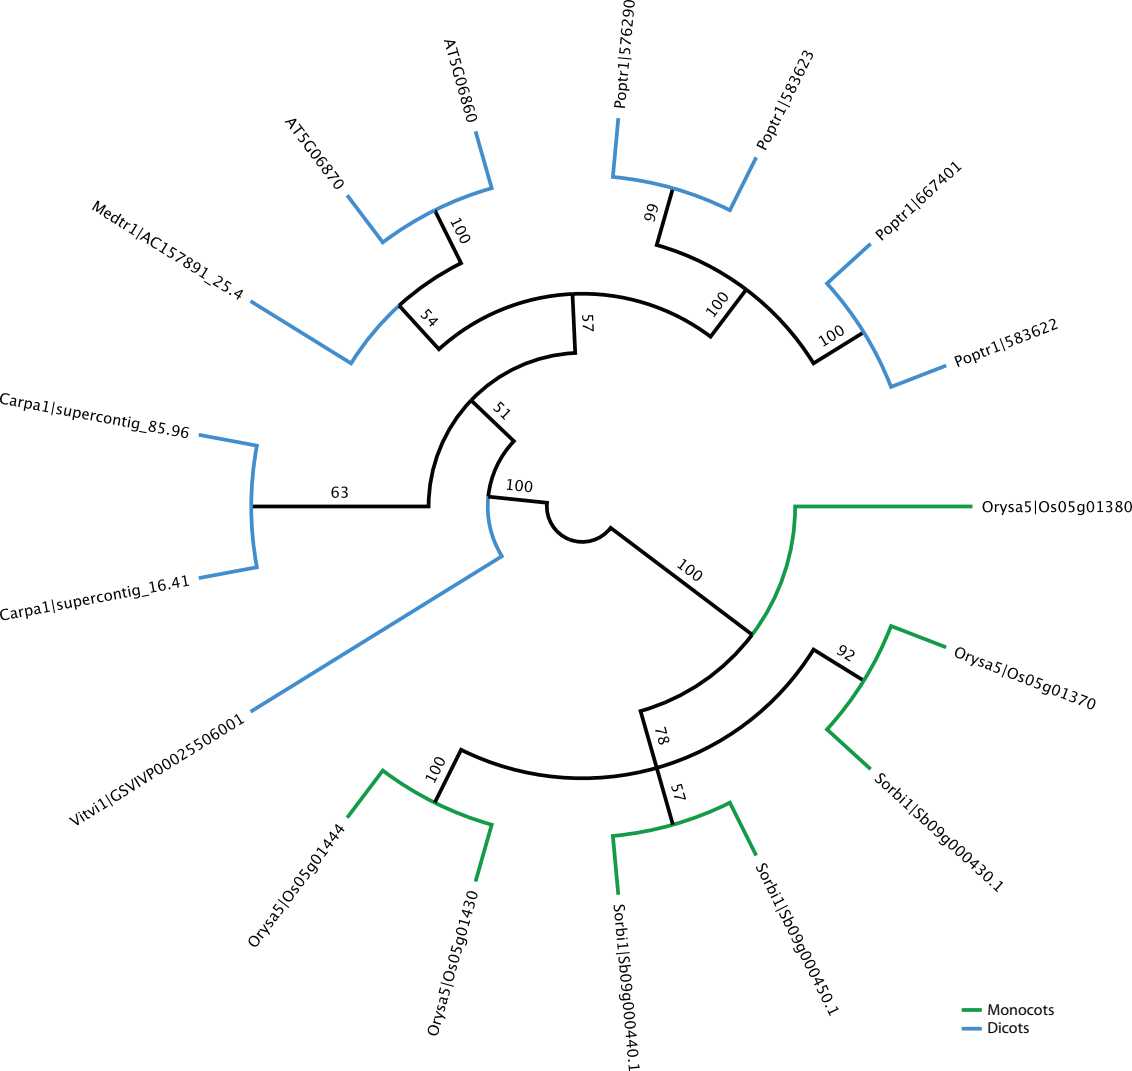

Supplement: 1471-2229-14-79-S7.pdf [file 1471-2229-14-79-S7.pdf]
